# Supplementary figures and images for: LncRNA-Associated Genetic Etiologies Are Shared between Type 2 Diabetes and Cancers in the UAE Population
Source: MDPI journal article supplement (doi:10.3390/cancers14143313), 2022-07-07

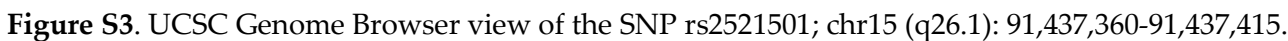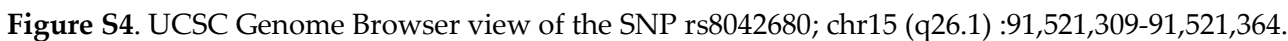

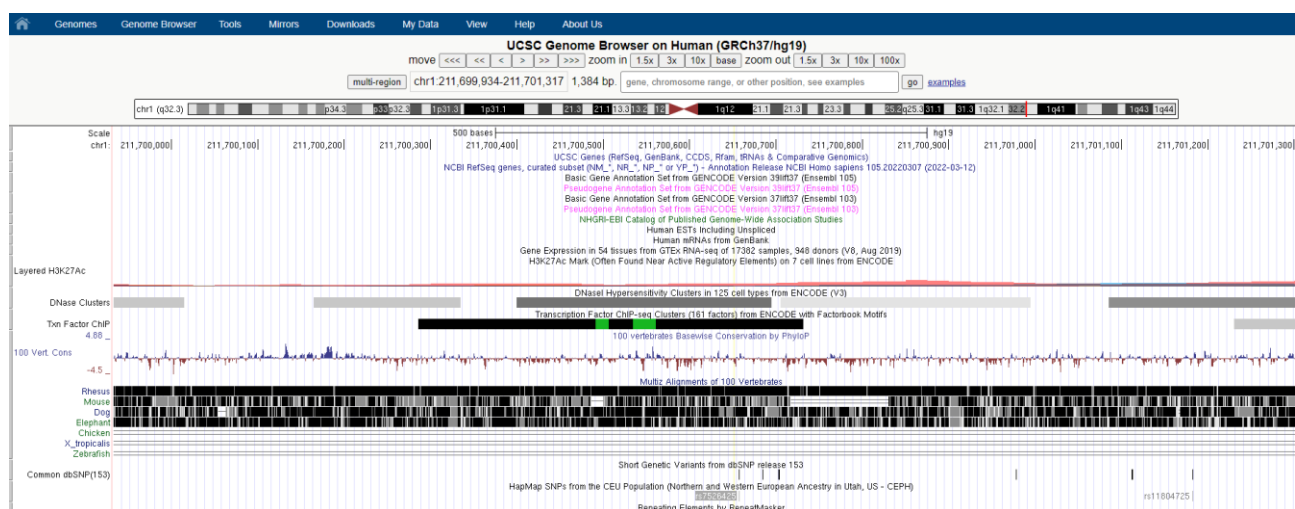

**Figure S5.** UCSC Genome Browser view of the SNP rs7526425; chr1: (q32.3) 211,700,630-211,700,685.

Supplement: s1 [file s1]
